# Supplementary material
Source: publisher site journal article supplement (https://www.dovepress.com/article/550692)
Supplement: Supplementary file 1 [file 550692_supplementary%20Table%201_1%20%2525282%252529.docx]

**SupplementaryTable 1**. Genes and primers used in RT-qPCR analysis

| Gene name | Primer sequence (5′→3′) |
| --- | --- |
| *HMGCR* (F) | AGGAACCTGAAATTGAACTT |
| *HMGCR* (R) | TAACTGTCGGCGAATAGATA |
| *HMGCS1* (F) | CATTAGACCGCTGCTATTCTGTC |
| *HMGCS1* (R) | TTCAGCAACATCCGAGCTAGA |
| β-actin (F) | TGGCACCCAGCACAATGAA |
| β-actin (R) | CTAAGTCATAGTCCGCCTAGAAGCA |
| F, forward; R, reverse. | |
